# Supplementary material for: Metabolomic Profiles of Aspergillus oryzae and Bacillus amyloliquefaciens During Rice Koji Fermentation
Source: PubMed Central journal article supplement (PMC6273993; doi:10.3390/molecules21060773), 2016-06-14
Supplement: molecules-21-00773-s001.pdf [file molecules-21-00773-s001.pdf]

# Supplementary Materials: Metabolomic Profiles of *Aspergillus oryzae* and *Bacillus amyloliquefaciens* During Rice *koji* Fermentation

Da Eun Lee Sunmin Lee, Eun Seok Jang, Hye Won Shin, Byoung Seok Moon and Choong Hwan Lee

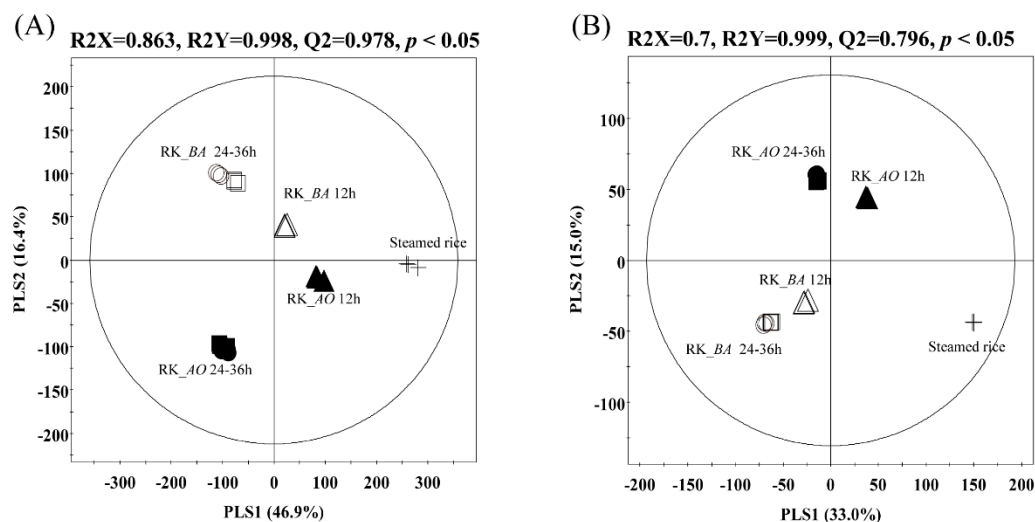

**Figure S1.** Partial least square-discriminate analysis (PLS-DA) score plot for rice *koji* fermented with *A. oryzae* (RK\_AO) or *B. amyloliquefaciens* (RK\_BA) during fermentation times obtained from GC-TOF-MS (a) and UHPLC-LTQ-IT-MS/MS (b). (+, Steamed rice; open symbol, RK\_AO; closed symbol, RK\_BA;  $\Delta$ ,  $\blacktriangle$ , 12 h;  $\square$ ,  $\blacksquare$ , 24 h;  $\circ$ ,  $\bullet$ , 36 h).

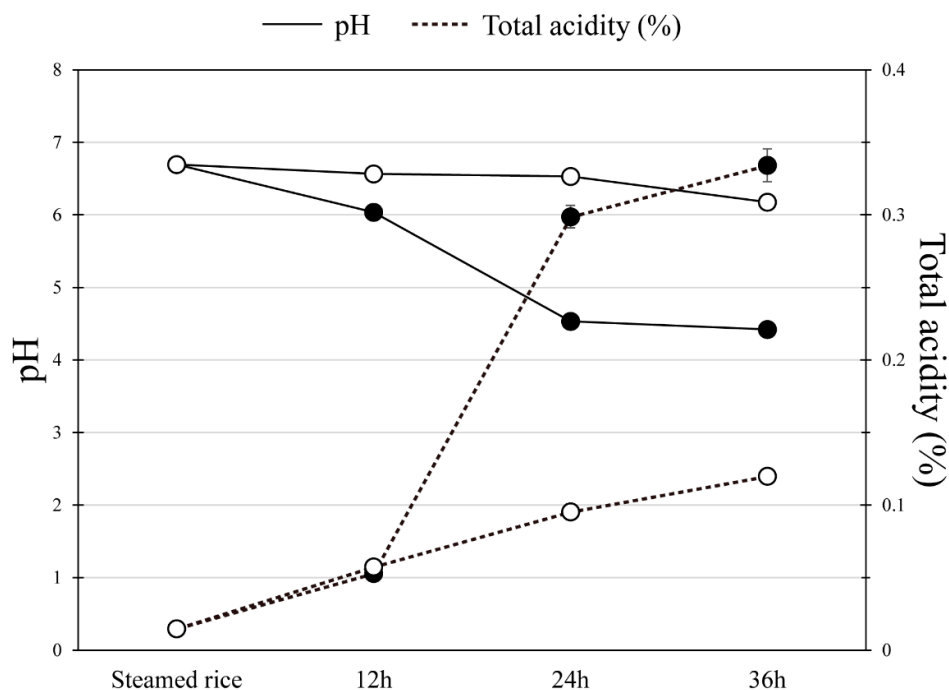

**Figure S2.** Comparison of pH and total acidity of rice *koji* fermented with *A. oryzae* (RK\_AO, closed circle) or *B. amyloliquefaciens* (RK\_BA, open circle) during fermentation times.

**Table S1.** Discriminative metabolites and their relative contents in rice *koji* fermented with *A. oryzae* (RK\_AO) or *B. amyloliquefaciens* (RK\_BA) during fermentation using GC-TOF-MS.

| Peak No.                         | Tentative Identification | <sup>a,b</sup> RT (min) | <sup>c</sup> Identified Ion ( <i>m/z</i> ) | <sup>d</sup> TMS | <sup>e</sup> Relative Contents (Peak Area [ $\log_{10}$ ]) <sup>f</sup> |             |             |             |             |             |             |
|----------------------------------|--------------------------|-------------------------|--------------------------------------------|------------------|-------------------------------------------------------------------------|-------------|-------------|-------------|-------------|-------------|-------------|
|                                  |                          |                         |                                            |                  | Steamed rice                                                            | RK_AO 12 h  | RK_AO 24 h  | RK_AO 36 h  | RK_BA 12 h  | RK_BA 24 h  | RK_BA 36 h  |
| <b>Sugars and sugar alcohols</b> |                          |                         |                                            |                  |                                                                         |             |             |             |             |             |             |
| 1                                | Glycerol                 | 7.13                    | 117                                        | 3                | 3.90 ± 0.04                                                             | 6.09 ± 0.00 | 7.01 ± 0.01 | 7.10 ± 0.05 | 6.32 ± 0.04 | 5.60 ± 0.04 | 5.60 ± 0.04 |
| 2                                | Erythritol               | 9.28                    | 117                                        | 4                | 3.95 ± 0.05                                                             | 3.8 ± 0.05  | 5.51 ± 0.03 | 5.93 ± 0.02 | 4.61 ± 0.12 | 4.26 ± 0.05 | 4.26 ± 0.05 |
| 3                                | Pentitol                 | 10.2                    | 231                                        | 4                | 3.77 ± 1.02                                                             | 4.85 ± 0.39 | 4.29 ± 0.06 | 3.87 ± 0.06 | 5.33 ± 0.17 | 5.71 ± 0.11 | 5.71 ± 0.11 |
| 4                                | Xylose                   | 10.5                    | 103                                        | 4                | 3.86 ± 0.06                                                             | 4.16 ± 0.05 | 5.30 ± 0.05 | 5.42 ± 0.03 | 5.16 ± 0.12 | 4.62 ± 0.06 | 4.62 ± 0.06 |
| 5                                | Xylitol                  | 10.89                   | 217                                        | 5                | 4.66 ± 0.05                                                             | 4.22 ± 0.07 | 5.01 ± 0.00 | 6.31 ± 0.03 | 4.26 ± 0.08 | 3.98 ± 0.04 | 3.98 ± 0.04 |
| 6                                | Fructose                 | 12.15                   | 103                                        | 5                | 5.52 ± 0.01                                                             | 5.65 ± 0.03 | 5.84 ± 0.07 | 5.77 ± 0.07 | 5.68 ± 0.09 | 4.97 ± 0.08 | 4.97 ± 0.08 |
| 7                                | Glucose                  | 12.28                   | 319                                        | 5                | 4.94 ± 0.01                                                             | 5.82 ± 0.02 | 6.11 ± 0.07 | 6.04 ± 0.02 | 5.83 ± 0.06 | 5.84 ± 0.02 | 5.84 ± 0.02 |
| 8                                | Sorbitol                 | 12.53                   | 421                                        | 6                | 4.00 ± 0.01                                                             | 4.27 ± 0.02 | 4.74 ± 0.00 | 4.50 ± 0.01 | 0.51 ± 0.89 | 0.60 ± 1.04 | 0.60 ± 1.04 |
| 9                                | myo-Inositol             | 13.53                   | 305                                        | 6                | 4.53 ± 0.01                                                             | 4.96 ± 0.01 | 5.66 ± 0.00 | 5.58 ± 0.01 | 4.40 ± 0.06 | 3.89 ± 0.05 | 3.89 ± 0.05 |
| 10                               | Maltose                  | 17.13                   | 204                                        | 8                | 4.85 ± 0.12                                                             | 6.52 ± 0.04 | 6.11 ± 0.06 | 6.05 ± 0.08 | 6.19 ± 0.01 | 6.54 ± 0.01 | 6.54 ± 0.01 |
| <b>Organic acids</b>             |                          |                         |                                            |                  |                                                                         |             |             |             |             |             |             |
| 11                               | Lactic acid              | 4.93                    | 117                                        | 2                | 4.69 ± 0.05                                                             | 4.76 ± 0.04 | 4.86 ± 0.07 | 5.05 ± 0.07 | 4.98 ± 0.06 | 5.42 ± 0.07 | 5.42 ± 0.07 |
| 12                               | Oxalic acid              | 5.68                    | 133                                        | 2                | 1.97 ± 0.01                                                             | 2.72 ± 0.03 | 3.20 ± 0.05 | 3.12 ± 0.02 | 2.93 ± 0.06 | 3.33 ± 0.05 | 3.33 ± 0.05 |
| 13                               | Malonic acid             | 6.44                    | 233                                        | 2                | 2.55 ± 0.08                                                             | 1.87 ± 0.03 | 2.17 ± 0.11 | 0.70 ± 1.22 | 2.52 ± 0.10 | 2.85 ± 0.11 | 2.85 ± 0.11 |
| 14                               | Succinic acid            | 7.49                    | 247                                        | 2                | 3.75 ± 0.13                                                             | 3.79 ± 0.02 | 4.86 ± 0.02 | 4.56 ± 0.04 | 3.79 ± 0.06 | 4.49 ± 0.05 | 4.49 ± 0.05 |
| 15                               | Glyceric acid            | 7.69                    | 189                                        | 3                | 4.19 ± 0.11                                                             | 3.79 ± 0.03 | 4.61 ± 0.08 | 4.59 ± 0.09 | 3.53 ± 0.11 | 3.87 ± 0.06 | 3.87 ± 0.06 |
| 16                               | Fumaric acid             | 7.79                    | 245                                        | 2                | 3.92 ± 0.10                                                             | 3.68 ± 0.04 | 4.68 ± 0.02 | 4.46 ± 0.03 | 3.67 ± 0.08 | 3.93 ± 0.12 | 3.93 ± 0.12 |
| 17                               | Malic acid               | 9.09                    | 233                                        | 3                | 4.29 ± 0.08                                                             | 4.07 ± 0.03 | 4.95 ± 0.04 | 4.64 ± 0.05 | 3.38 ± 0.06 | 3.76 ± 0.04 | 3.76 ± 0.04 |
| 18                               | Kojic acid               | 10.6                    | 271                                        | 2                | 1.46 ± 0.08                                                             | 3.23 ± 0.08 | 3.31 ± 0.09 | 4.39 ± 0.05 | 3.18 ± 0.07 | 2.39 ± 0.41 | 2.39 ± 0.41 |
| 19                               | Shikimic acid            | 11.54                   | 204                                        | 4                | 3.52 ± 0.08                                                             | 3.11 ± 0.21 | 3.56 ± 0.18 | 3.17 ± 0.17 | 3.57 ± 0.12 | 3.90 ± 0.12 | 3.90 ± 0.12 |
| 20                               | Citric acid              | 11.67                   | 273                                        | 4                | 4.21 ± 0.10                                                             | 4.73 ± 0.04 | 6.55 ± 0.01 | 6.56 ± 0.01 | 5.11 ± 0.07 | 4.05 ± 0.07 | 4.05 ± 0.07 |
| 21                               | Gluconic acid            | 12.97                   | 292                                        | 5                | 4.73 ± 0.02                                                             | 4.95 ± 0.00 | 5.20 ± 0.01 | 5.10 ± 0.01 | 4.67 ± 0.06 | 4.25 ± 0.04 | 4.25 ± 0.04 |
| <b>Phenolic acids</b>            |                          |                         |                                            |                  |                                                                         |             |             |             |             |             |             |
| 22                               | 4-Hydroxybenzoic acid    | 10.2                    | 267                                        | 2                | 3.25 ± 0.10                                                             | 3.01 ± 0.02 | 4.17 ± 0.07 | 3.76 ± 0.06 | 3.02 ± 0.11 | 1.80 ± 1.56 | 1.80 ± 1.56 |
| 23                               | Ferulic acid             | 13.42                   | 249                                        | 2                | 2.90 ± 0.04                                                             | 3.51 ± 0.02 | 3.87 ± 0.02 | 3.38 ± 0.03 | 2.61 ± 0.17 | 2.08 ± 0.22 | 2.08 ± 0.22 |
| <b>Amino acids</b>               |                          |                         |                                            |                  |                                                                         |             |             |             |             |             |             |
| 24                               | Alanine                  | 5.37                    | 116                                        | 2                | 4.49 ± 0.07                                                             | 4.22 ± 0.03 | 5.41 ± 0.06 | 5.26 ± 0.07 | 4.22 ± 0.16 | 4.95 ± 0.09 | 4.95 ± 0.09 |
| 25                               | Valine                   | 6.57                    | 144                                        | 2                | 3.75 ± 0.03                                                             | 4.19 ± 0.06 | 5.67 ± 0.05 | 5.52 ± 0.05 | 5.21 ± 0.02 | 6.09 ± 0.05 | 6.09 ± 0.05 |
| 26                               | Leucine                  | 7.12                    | 158                                        | 2                | 3.53 ± 0.03                                                             | 4.65 ± 0.02 | 5.65 ± 0.11 | 4.91 ± 0.01 | 5.22 ± 0.05 | 6.10 ± 0.03 | 6.10 ± 0.03 |
| 27                               | Isoleucine               | 7.34                    | 158                                        | 2                | 3.37 ± 0.03                                                             | 4.07 ± 0.02 | 5.58 ± 0.03 | 5.60 ± 0.03 | 4.92 ± 0.04 | 5.84 ± 0.04 | 5.84 ± 0.04 |

|                    |                   |       |     |   |             |             |             |                 |             |             |             |
|--------------------|-------------------|-------|-----|---|-------------|-------------|-------------|-----------------|-------------|-------------|-------------|
| 28                 | Proline           | 7.39  | 142 | 2 | 4.48 ± 0.06 | 4.98 ± 0.01 | 5.72 ± 0.06 | 5.69 ± 0.02     | 4.21 ± 0.03 | 5.14 ± 0.05 | 5.14 ± 0.05 |
| 29                 | Glycine           | 7.47  | 174 | 3 | 4.96 ± 0.02 | 4.73 ± 0.01 | 5.83 ± 0.02 | 4.93 ± 0.03     | 4.62 ± 0.05 | 5.26 ± 0.06 | 5.26 ± 0.06 |
| 30                 | Serine            | 7.87  | 204 | 3 | 4.34 ± 0.03 | 4.39 ± 0.05 | 5.59 ± 0.03 | 5.49 ± 0.03     | 4.38 ± 0.04 | 4.70 ± 0.08 | 4.70 ± 0.08 |
| 31                 | Threonine         | 8.22  | 219 | 3 | 3.52 ± 0.06 | 3.71 ± 0.08 | 5.14 ± 0.05 | 5.08 ± 0.04     | 3.96 ± 0.04 | 4.51 ± 0.06 | 4.51 ± 0.06 |
| 32                 | Methionine        | 9.36  | 176 | 2 | 2.66 ± 0.12 | 3.39 ± 0.07 | 5.06 ± 0.04 | 4.87 ± 0.04     | 4.45 ± 0.05 | 5.15 ± 0.07 | 5.15 ± 0.07 |
| 33                 | Aspartic acid     | 9.36  | 232 | 3 | 4.42 ± 0.06 | 4.23 ± 0.05 | 5.39 ± 0.05 | 5.35 ± 0.05     | 4.10 ± 0.03 | 4.15 ± 0.08 | 4.15 ± 0.08 |
| 34                 | Pyroglutamic acid | 9.41  | 156 | 2 | 5.17 ± 0.06 | 4.95 ± 0.07 | 6.02 ± 0.06 | 5.87 ± 0.05     | 5.36 ± 0.04 | 5.87 ± 0.08 | 5.87 ± 0.08 |
| 35                 | GABA              | 9.43  | 174 | 3 | 5.04 ± 0.02 | 3.83 ± 0.04 | 6.06 ± 0.02 | 6.01 ± 0.03     | 4.62 ± 0.09 | 4.54 ± 0.02 | 4.54 ± 0.02 |
| 36                 | Glutamic acid     | 10.14 | 246 | 3 | 4.33 ± 0.06 | 4.04 ± 0.01 | 5.16 ± 0.02 | 4.89 ± 0.01     | 4.70 ± 0.10 | 5.28 ± 0.02 | 5.28 ± 0.02 |
| 37                 | Phenylalanine     | 10.24 | 218 | 2 | 3.19 ± 0.17 | 3.98 ± 0.11 | 5.42 ± 0.06 | 5.22 ± 0.06     | 5.11 ± 0.10 | 5.89 ± 0.05 | 5.89 ± 0.05 |
| 38                 | Ornithine         | 11.63 | 142 | 4 | 2.30 ± 0.06 | 2.93 ± 0.03 | 3.91 ± 0.08 | 3.96 ± 0.08     | 3.69 ± 0.07 | 4.56 ± 0.06 | 4.56 ± 0.06 |
| 39                 | Lysine            | 12.35 | 156 | 4 | 3.48 ± 0.09 | 3.29 ± 0.12 | 3.22 ± 0.09 | ND <sup>g</sup> | 4.38 ± 0.12 | 4.93 ± 0.06 | 4.93 ± 0.06 |
| 40                 | Tyrosine          | 12.48 | 218 | 3 | 3.96 ± 0.06 | 3.71 ± 0.06 | 3.97 ± 0.02 | 4.11 ± 0.02     | 5.35 ± 0.08 | 6.05 ± 0.04 | 6.05 ± 0.04 |
| 41                 | Tryptophan        | 14.27 | 202 | 3 | 3.71 ± 0.11 | 3.57 ± 0.10 | 4.78 ± 0.13 | 4.66 ± 0.20     | 4.21 ± 0.21 | 4.93 ± 0.12 | 4.93 ± 0.12 |
| <b>Fatty acids</b> |                   |       |     |   |             |             |             |                 |             |             |             |
| 42                 | Palmitic acid     | 13.05 | 132 | 1 | 5.10 ± 0.01 | 5.13 ± 0.01 | 5.68 ± 0.01 | 5.59 ± 0.01     | 5.48 ± 0.08 | 5.31 ± 0.03 | 5.31 ± 0.03 |
| 43                 | Linoleic acid     | 14.09 | 262 | 1 | 4.69 ± 0.00 | 4.65 ± 0.01 | 4.98 ± 0.01 | 4.93 ± 0.01     | 4.92 ± 0.03 | 4.69 ± 0.02 | 4.69 ± 0.02 |
| 44                 | Oleic acid        | 14.12 | 339 | 1 | 4.22 ± 0.01 | 4.47 ± 0.00 | 4.77 ± 0.00 | 4.73 ± 0.02     | 4.79 ± 0.03 | 4.54 ± 0.02 | 4.54 ± 0.02 |
| 45                 | Linolenic acid    | 14.16 | 335 | 1 | 3.28 ± 0.03 | 3.09 ± 0.16 | 3.72 ± 0.18 | 3.59 ± 0.17     | 3.45 ± 0.17 | 3.47 ± 0.11 | 3.47 ± 0.11 |
| 46                 | Stearic acid      | 14.23 | 341 | 1 | 3.25 ± 0.04 | 3.3 ± 0.01  | 3.84 ± 0.02 | 3.71 ± 0.03     | 3.58 ± 0.07 | 3.71 ± 0.03 | 3.71 ± 0.03 |
| <b>Vitamins</b>    |                   |       |     |   |             |             |             |                 |             |             |             |
| 47                 | Nicotinic acid    | 7.36  | 180 | 1 | 4.3 ± 0.09  | 3.6 ± 0.05  | 3.73 ± 0.05 | 4.00 ± 0.03     | 1.18 ± 1.02 | 0.85 ± 0.85 | 0.85 ± 0.85 |

<sup>a</sup> Tentative metabolites identified by mass spectrum consistent with those of standard compound, NIST, and in-house library; <sup>b</sup> The different metabolites based on variable importance projection (VIP) analysis with a cutoff value of 0.7 and a *p* value <0.05; <sup>c</sup> Retention time; <sup>d</sup> The selected ion is *m/z* value for identification and quantification; <sup>e</sup> TMS: trimethylsilyl; <sup>f</sup> The relative contents of metabolites were represented as peak area transformed by log<sub>10</sub>. Mean (*n* = 3) ± standard deviation; <sup>g</sup> ND: Not detected.

**Table S2.** Discriminative metabolites and their relative contents in rice *koji* fermented with *A. oryzae* (RK\_AO) or *B. amyloliquefaciens* (RK\_BA) during fermentation using UHPLC-LTQ-IT-MS/MS.

| Peak No.                 | Tentative Identification <sup>a,b</sup> | RT (min) <sup>c</sup> | Measured Mass [M + H] <sup>+</sup> | MS <sup>n</sup> Fragment Ions | UV (nm)       | Relative Contents (Peak Area [log <sub>10</sub> ]) <sup>d</sup> |                 |             |             |             |             |             |
|--------------------------|-----------------------------------------|-----------------------|------------------------------------|-------------------------------|---------------|-----------------------------------------------------------------|-----------------|-------------|-------------|-------------|-------------|-------------|
|                          |                                         |                       |                                    |                               |               | Steamed Rice                                                    | RK_AO 12 h      | RK_AO 24 h  | RK_AO 36 h  | RK_BA 12 h  | RK_BA 24 h  | RK_BA 36 h  |
| <b>Flavonoids</b>        |                                         |                       |                                    |                               |               |                                                                 |                 |             |             |             |             |             |
| 48                       | Apigenin-C-glucosyl-C-arabinoside       | 6.7                   | 565                                | 565 > 547 > 499               | 272, 334      | 3.72 ± 0.01                                                     | ND <sup>e</sup> | ND          | ND          | 4.81 ± 0.01 | 4.91 ± 0.01 | 4.93 ± 0.01 |
| 49                       | Isovitexin-O-glucoside                  | 7.1                   | 595                                | 595 > 577 > 529               | 309           | 3.30 ± 0.03                                                     | ND              | ND          | ND          | 4.51 ± 0.04 | 4.71 ± 0.03 | 4.71 ± 0.01 |
| 50                       | Chrysoeriol-hexoside                    | 7.8                   | 463                                | -                             | 322           | 2.98 ± 0.02                                                     | ND              | ND          | ND          | 4.37 ± 0.01 | 4.56 ± 0.02 | 4.61 ± 0.01 |
| 51                       | Chrysoeriol-rutinoside                  | 8.1                   | 609                                | -                             | 246, 322      | 3.30 ± 0.02                                                     | ND              | ND          | ND          | 4.08 ± 0.04 | 4.28 ± 0.03 | 4.40 ± 0.03 |
| 52                       | Tricin-7-O-rutinoside                   | 8.1                   | 639                                | 639 > 493 > 331               | 340           | ND                                                              | ND              | ND          | ND          | 4.52 ± 0.01 | 4.65 ± 0.02 | 4.67 ± 0.01 |
| 53                       | Tricin-O-glucoside                      | 8.5                   | 493                                | 493 > 331                     | 330           | 3.00 ± 0.04                                                     | ND              | ND          | ND          | 4.11 ± 0.04 | 4.27 ± 0.02 | 4.27 ± 0.02 |
| 54                       | Tricin                                  | 10.8                  | 331                                | -                             | -             | 3.98 ± 0.02                                                     | 4.31 ± 0.01     | 4.53 ± 0.01 | 4.45 ± 0.03 | 4.52 ± 0.02 | 4.59 ± 0.02 | 4.56 ± 0.02 |
| <b>Fatty acids</b>       |                                         |                       |                                    |                               |               |                                                                 |                 |             |             |             |             |             |
| 55                       | Pinellic acid                           | 10.9                  | 353 <sup>*</sup>                   | -                             | 217, 302      | 4.37 ± 0.01                                                     | 5.00 ± 0.02     | 5.34 ± 0.01 | 5.34 ± 0.04 | 5.03 ± 0.03 | 5.23 ± 0.04 | 5.26 ± 0.00 |
| 56                       | Hydroxy-oxo-octadecenoic acid           | 13.1                  | 313                                | 313 > 297 > 279               | 221, 273      | 4.78 ± 0.03                                                     | 4.74 ± 0.02     | 4.98 ± 0.01 | 4.98 ± 0.02 | 4.64 ± 0.04 | 4.68 ± 0.05 | 4.69 ± 0.06 |
| <b>Lysophospholipids</b> |                                         |                       |                                    |                               |               |                                                                 |                 |             |             |             |             |             |
| 57                       | LysoPE14:0                              | 13.5                  | 426                                | 426 > 408 > 365               | 220           | 4.63 ± 0.15                                                     | 4.20 ± 0.02     | 4.76 ± 0.02 | 4.90 ± 0.02 | 5.00 ± 0.05 | 5.40 ± 0.03 | 5.44 ± 0.01 |
| 58                       | LysoPC14:0                              | 13.7                  | 468                                | 468 > 450                     | 220           | 5.85 ± 0.03                                                     | 5.87 ± 0.77     | 6.41 ± 0.11 | 6.45 ± 0.04 | 6.42 ± 0.05 | 6.63 ± 0.04 | 6.62 ± 0.09 |
| 59                       | LysoPC18:3                              | 13.9                  | 518                                | 519 > 500                     | 221           | 5.27 ± 0.08                                                     | 4.83 ± 0.27     | 5.43 ± 0.06 | 5.11 ± 0.51 | 5.52 ± 0.09 | 5.74 ± 0.02 | 5.78 ± 0.03 |
| 60                       | LysoPC16:1                              | 14.3                  | 494                                | 494 > 476                     | 220           | 4.67 ± 0.08                                                     | 4.19 ± 0.21     | 4.80 ± 0.07 | 4.71 ± 0.09 | 4.86 ± 0.08 | 4.89 ± 0.10 | 4.98 ± 0.03 |
| 61                       | LysoPE18:2                              | 14.5                  | 478                                | 478 > 460 > 263               | -             | 5.26 ± 0.03                                                     | 5.09 ± 0.05     | 5.67 ± 0.02 | 5.80 ± 0.02 | 5.83 ± 0.04 | 6.30 ± 0.03 | 6.40 ± 0.01 |
| 62                       | LysoPC18:2                              | 14.9                  | 520                                | 520 > 502                     | 301           | 5.74 ± 0.15                                                     | 5.97 ± 0.20     | 6.40 ± 0.13 | 6.38 ± 0.07 | 6.27 ± 0.06 | 6.41 ± 0.06 | 6.50 ± 0.04 |
| 63                       | LysoPE16:0                              | 15.2                  | 454                                | 454 > 436 > 393               | 223           | 5.21 ± 0.02                                                     | 4.96 ± 0.08     | 5.56 ± 0.01 | 5.64 ± 0.03 | 5.58 ± 0.04 | 6.03 ± 0.05 | 6.10 ± 0.02 |
| 64                       | LysoPC16:0                              | 15.7                  | 496                                | 496 > 478, 184                | 224           | 5.75 ± 0.17                                                     | 6.22 ± 0.10     | 6.56 ± 0.07 | 6.39 ± 0.10 | 6.41 ± 0.08 | 6.59 ± 0.15 | 6.57 ± 0.10 |
| 65                       | LysoPC18:1                              | 16.3                  | 522                                | 522 > 504                     | 223, 277      | 5.00 ± 0.16                                                     | 5.28 ± 0.06     | 5.40 ± 0.65 | 5.41 ± 0.20 | 5.60 ± 0.17 | 5.69 ± 0.11 | 5.79 ± 0.13 |
| <b>Siderophores</b>      |                                         |                       |                                    |                               |               |                                                                 |                 |             |             |             |             |             |
| 66                       | Bacillibactin                           | 9.5                   | 883                                | 883 > 690 > 672               | 209, 247, 313 | ND                                                              | ND              | ND          | ND          | 5.16 ± 0.04 | 5.91 ± 0.02 | 6.16 ± 0.02 |
| <b>Unknown</b>           |                                         |                       |                                    |                               |               |                                                                 |                 |             |             |             |             |             |
| 67                       | N.I1                                    | 1.5                   | 294                                | 294 > 276 > 258               | 225, 261, 364 | 4.57 ± 0.02                                                     | 6.32 ± 0.02     | 6.91 ± 0.01 | 6.81 ± 0.01 | 5.65 ± 0.01 | 5.44 ± 0.01 | 5.53 ± 0.01 |
| 68                       | N.I2                                    | 7.0                   | 480                                | 480 > 462 > 396               | 270           | ND                                                              | 4.56 ± 0.02     | 5.78 ± 0.01 | 5.30 ± 0.01 | ND          | ND          | ND          |
| 69                       | N.I3                                    | 9.4                   | 420                                | 420 > 402 > 384               | -             | ND                                                              | ND              | ND          | ND          | 5.35 ± 0.03 | 5.65 ± 0.04 | 5.70 ± 0.03 |
| 70                       | N.I4                                    | 10.8                  | 333                                | 333 > 297 > 279               | 214, 344      | 4.39 ± 0.03                                                     | 4.64 ± 0.03     | 4.87 ± 0.02 | 4.81 ± 0.03 | 4.40 ± 0.03 | 4.28 ± 0.05 | 4.34 ± 0.02 |
| 71                       | N.I5                                    | 11.7                  | 402                                | 402 > 384 > 366               | 218, 300      | ND                                                              | ND              | ND          | ND          | 5.75 ± 0.05 | 5.96 ± 0.04 | 6.00 ± 0.03 |
| 72                       | N.I6                                    | 13.0                  | 588                                | 588 > 570 > 552               | 221, 272      | 5.08 ± 0.03                                                     | 5.25 ± 0.01     | 5.34 ± 0.02 | 5.43 ± 0.02 | 5.02 ± 0.04 | 4.29 ± 0.04 | ND          |
| 73                       | N.I7                                    | 13.2                  | 638                                | 638 > 620 > 602               | 221, 271      | 4.70 ± 0.03                                                     | 4.86 ± 0.01     | 4.97 ± 0.01 | 5.07 ± 0.01 | 4.62 ± 0.03 | ND          | ND          |
| 74                       | N.I8                                    | 14.0                  | 640                                | 640 > 622 > 604               | 366           | 5.64 ± 0.01                                                     | 6.16 ± 0.03     | 6.37 ± 0.03 | 6.07 ± 0.67 | 6.02 ± 0.04 | 5.26 ± 0.02 | 5.20 ± 0.09 |

<sup>a</sup> Tentative metabolites identified by comparing data to published literature and an in-house library; <sup>b</sup> The different metabolites based on variable importance projection(VIP) analysis with a cutoff value of 0.7 and a *p*-value <0.05; <sup>c</sup> Retention time; <sup>d</sup> The relative contents of metabolites were represented as peak area transformed by log<sub>10</sub>. Mean (*n* = 3) ± standard deviation; <sup>e</sup> ND: Not detected; \* Adduct ion is sodium, [M + Na]<sup>+</sup>.
